# Supplementary material for: Compensatory effects conceal large uncertainties in the modelled processes behind the ENSO-CO 2 relationship
Source: Copernicus journal article supplement (doi:10.5194/esd-2024-7), 2024-02-21
Supplement: Supplementary file [file esd-2024-7-AC1-supplement.pdf]

## **Author answers to the comments of the manuscript “Compensatory effects conceal large uncertainties in the modelled processes behind the ENSO-CO<sub>2</sub> relationship”**

### **RC1:**

Review of “compensatory effects conceal large uncertainties in the modelled processes behind the ENSO-CO<sub>2</sub> relationship”, by Dunkl et al.

This is a well written and explained paper exploring in some depth how the land carbon cycle responds to El Nino events and getting beneath the skin of multiple ESMs. The study breaks apart the response into the magnitude of ENSO, the spatial patterns of climate teleconnections and then the land-carbon sensitivity to these. The latter controls the majority of the spread in modelled responses.

The paper is useful both as a process study on drivers of carbon cycle variability but also in terms of guiding model groups/development plans and evaluation techniques. I recommend publication with minor revisions.

> We thank Chris Jones for the careful reading of the manuscript. His summary reflects our views on the matter well, and we are grateful for the constructive comments.

I have one major concern though, and that is the use of TRENDY model results as “observations” against which to evaluate ESMs. This is problematic in a couple of ways

- Firstly these are clearly not “observations” – they have some link to observed meteorology as they are driven by it – but the response is very much a model response
- Secondly, and maybe more important – they are not at all independent of the models you are evaluating. There is a very big overlap between the land schemes in CMIP6 ESMs and the land models used for TRENDY.

So I am afraid you simply cannot use these in the way you do now as observations.

> We agree that the TRENDY data does not qualify as “observations”. The TRENDY ensemble is based on the output of land surface models, some of which are components of the ESMs used in this study.

I think this issue has a couple of solutions – depending on your appetite for further study. The simple solution is to drop TRENDY models. You have two other “observation” data sets (which are also not pure obs – as per first objection above – but they are closer to this and they are independent of CMIP6 land schemes). The paper could stand equally well using these two datasets and I don’t think the conclusions would be affected.

A more thorough, and satisfying, outcome could be to make use of the overlap and to see TRENDY results as part-way between the CMIP6 ESMs and the observations. You could even explore a pair-wise comparison for many of the TRENDY/CMIP shared land models (e.g. compare UKESM with JULES, or MPIESM with JSBACH). Where would individual TRENDY models sit on figure 4 for example? I assume they would all be at the same x-axis location (as Nino3.4 is imposed on them), but they would span the same vertical extent as CMIP models?? Can we learn anything by comparing the offline and coupled land schemes. I think in general treating TRENDY as models rather than obs is a better way forward.

> We will describe the constraints of using TRENDY data as a comparison in the methodology. In the results section, we will separate out the TRENDY data from CAMS and FLUXCOM and make a clear distinction. The TRENDY data will be shown, but it will not be part of the “Observations” in figures 2 and 5.

Other, minor comments

- I miss any mention of other studies which have tried to constrain CMIP outcomes based on interannual variability. Jones et al (2001) did an early exploration of how a single ESM responded to ENSO and since then several studies have used this as a constrain on future behaviour – notably Cox et al (2013). Do your results have any implications for this approach?

> Cox et al 2013 provides a good foundation on the scale of the uncertainty in the sensitivity of tropical carbon fluxes to temperature anomalies in CMIP5 models, and how this uncertainty relates to atmospheric CO2 IAV. We will link our findings on CMIP6 models regarding this issue and add the role of spatial heterogeneity in the sensitivity of tropical carbon fluxes to climate anomalies.

- Re CMIP6 model selection – I would recommend caution when using multiple models which are very close variants – e.g. NoESM2-LM and -MM are essentially the same model except for spatial resolution. The land surface is identical. Likewise the various CMCC variants. Do they really add extra info to this particular study of land response? (maybe they do if the ENSO characteristics differ for example). It might simplify things to reduce the sampling to only one variant from each model family. This might feel like you are taking a smaller sample, but actually by double-sampling the same model you may skew the results.

> Although we do not expect strong resolution dependent effects from the land surface models, ENSO dynamics can be altered by a higher resolution of the ocean or atmosphere. Although the two CMCC variants have similar components we still see strong differences in ENSO strength for example.

- It is often quoted that a multi-model mean performs better than individual members (see Jones et al 2023 for a discussion on this for CMIP6 carbon cycle at regional scale). It would be interesting to see the CMIP6 multi-model mean in your evaluation as well as single models.

> The multi-model mean can provide an interesting additional insight. We will add it to the results where feasible.

- Figure 3 – can you zoom in on the panels? It is very hard to read much into the results for regions other than SEA and NSA. I realise this would break the nice feature of having the same x-axis for all panels, but I think the other panels are just too small to see much clearly.

> We will create a new figure with one x-axis range for the first two panels, and another range for the remaining panels.

- The inverse relationship between Nino magnitude and NBP sensitivity is interesting – can you comment why you think this might come about? I cannot think of a process-reason for it – why would models with bigger ENSO have lower sensitivity? Is this an artefact of trying to cancel out errors in a model calibration stage? It would be interesting if all model groups had done that!

> We also suspected the relationship to arise from model tuning. However, different model developers could not confirm this in personal communication. Can we still add this possible explanation to the manuscript.

- I like that you split into NPP and respiration – that’s nice (also seen in Jones et al 2001). Did you think about any obs for this step? I know MODIS NPP is not perfect, but could be useful to identify spatial patterns of NPP for example even if the absolute magnitude is not reliable.

> Thank you for the suggestion. It would be beneficial to have this division of NBP in the observations as well. However we decided against using different data sources for the individual carbon fluxes as this would bring in too many constraints.

- A final comment – you discuss a lot, and very well, the differences between models and how the two ends of the responses differ. But actually I am also struck that generally most models do OK. For example my first reaction on seeing figure 5 is that generally ESM vs OBS picks up very good extent of the signal between regions. I think it would be useful to say this – that actually CMIP models are not bad. OK they differ in details, and some can be far away from the obs for some metrics. But overall the agreement is encouraging.

> This feeds into the earlier comment on the multi-model mean. Indeed figure 5 visualizes the overall agreement in the spatial patterns quite well. We will add some words on this overall agreement to balance the view.

- Jones 2001: [https://journals.ametsoc.org/view/journals/clim/14/21/1520-0442\\_2001\\_014\\_4113\\_tccrte\\_2.0.co\\_2.xml](https://journals.ametsoc.org/view/journals/clim/14/21/1520-0442_2001_014_4113_tccrte_2.0.co_2.xml)
- Cox 2013: <https://www.nature.com/articles/nature11882>
- Jones 2023: <https://agupubs.onlinelibrary.wiley.com/doi/full/10.1029/2023AV001024>

**Citation:** <https://doi.org/10.5194/esd-2024-7-RC1>
